# Supplementary material for: Tunable immunonanoparticle binding to cancer cells: thermodynamic analysis of targeted drug delivery vehicles
Source: Royal Society of Chemistry journal article supplement (doi:10.1039/b814204a), 2009-01-01
Supplement: b814204a.pdf [file b814204a.pdf]

## Electronic Supplementary Information (ESI) for Soft Matter

### Tunable immunonanoparticle binding to cancer cells: thermodynamic analysis of targeted drug delivery vehicles

Karyn Ho,<sup>a,b</sup> Yakov Lapitsky,<sup>a</sup> Meng Shi,<sup>a,b</sup> and Molly S. Shoichet<sup>a-c,\*</sup>

a. Department of Chemical Engineering & Applied Chemistry, University of Toronto

b. Institute of Biomaterials & Biomedical Engineering, University of Toronto

c. Department of Chemistry, University of Toronto

\*Corresponding author

Molly S. Shoichet

University of Toronto

160 College Street, Room 514, Toronto, ON, Canada M5S 3E1

Tel: (416) 978-1460

Fax: (416) 978-4317

E-mail: molly.shoichet@utoronto.ca

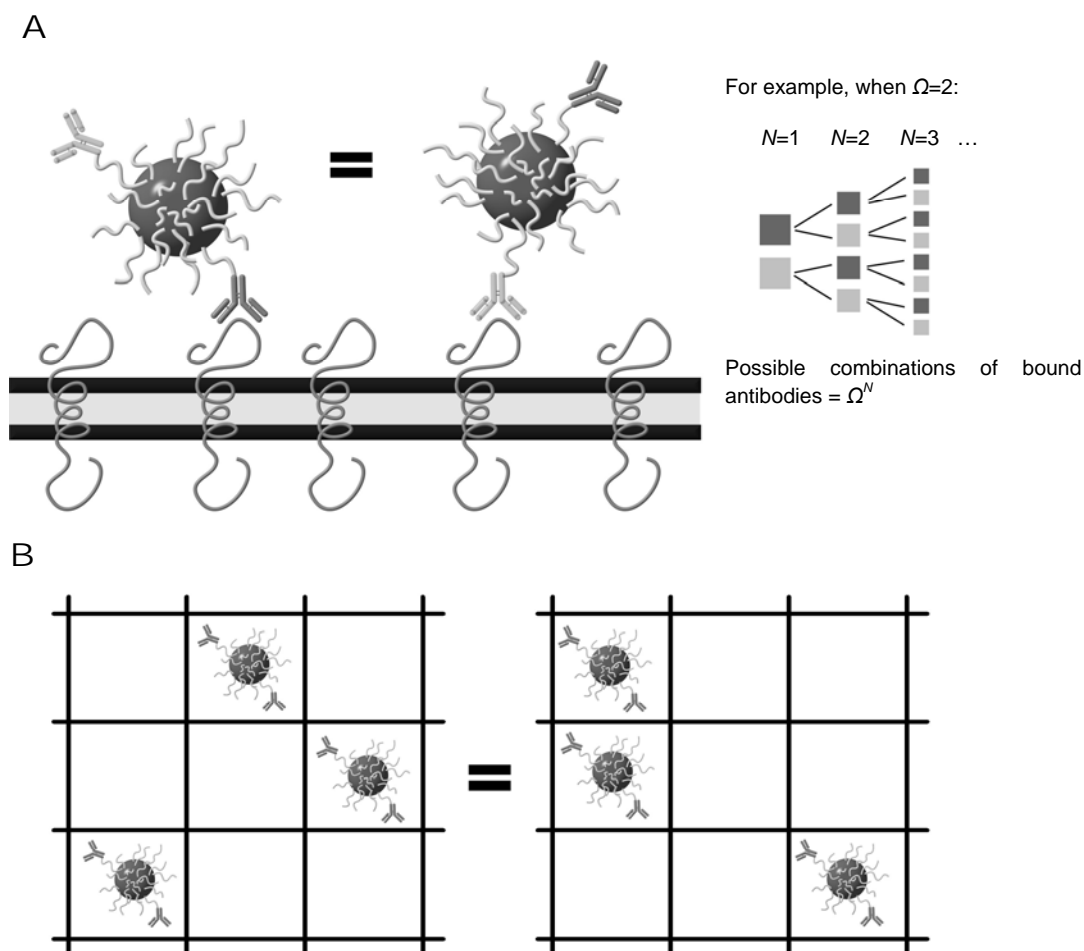

**Figure S1.** In the case of monovalent binding, increasing the number of antibodies per particle,  $\Omega$ , results in an increase in the number of possible binding configurations where only one interaction occurs. **(A)** The number of possible combinations of monovalent binding events increases with the number of conjugated antibodies due to an amplified number of possible rotational binding orientations for  $N$  bound nanoparticles (first term of Equation 5). **(B)** Also, given a lattice of  $M$  potential binding sites, the number of distinct lattice configurations in which the particles can bind is given by a binomial coefficient (second term of Equation 5).
